# Supplementary material for: Impaired ability of Nef to counteract SERINC5 is associated with reduced plasma viremia in HIV-infected individuals
Source: PubMed Central journal article supplement (PMC7656250; doi:10.1038/s41598-020-76375-w), 2020-11-10
Supplement: 41598_2020_76375_MOESM1_ESM.pdf [file 41598_2020_76375_MOESM1_ESM.pdf]

## **Supplementary materials (Table S1 and Figure S1, S2)**

### **Impaired ability of Nef to counteract SERINC5 is associated with reduced plasma viremia in HIV-infected individuals**

Mako Toyoda<sup>1\*</sup>, Doreen Kamori<sup>1\*</sup>, Toong Seng Tan<sup>1</sup>, Kageaki Goebuchi<sup>1</sup>, Jun Ohashi<sup>2</sup>, Jonathan Carlson<sup>3</sup>, Ai Kawana-Tachikawa<sup>4</sup>, Hiroyuki Gatanaga<sup>1,5</sup>, Shinichi Oka<sup>1,5</sup>, Massimo Pizzato<sup>6</sup>, Takamasa Ueno<sup>1#</sup>

<sup>1</sup>Joint Research Center for Human Retrovirus Infection, Kumamoto University, Japan;

<sup>2</sup>University of Tokyo, Tokyo, Japan; <sup>3</sup>Microsoft Research, Los Angeles, CA, USA;

<sup>4</sup>AIDS Research Center, National Institute of Infectious Diseases, Tokyo, Japan;

<sup>5</sup>National Center for Global Health and Medicine, Tokyo, Japan; <sup>6</sup>Department of Cellular, Computational and Integrative Biology, University of Trento, Italy

\*MT and DK contributed equally to this work.

#Corresponding author; uenotaka@kumamoto-u.ac.jp

**Table S1 HIV-1 Nef HLA-associated polymorphisms in the Japanese cohort (q < 0.2).**

The direction of the association (adapted vs. nonadapted) for the specific HLA allele in question is specified. P-values and q-values represent the minimum values observed using a phylogenetically corrected logistic regression model. The columns TT-FF denote the 2x2 contingency table. TT=number of patient with both HLA allele and the target amino acid. TF=number of patients with HLA allele and without the target amino acid.

| Predictor HLA | Target Position | Target AA | onsensus A | Direction  | TT  | TF  | FT  | FF  | N   | P Value  | Q Value  |
|---------------|-----------------|-----------|------------|------------|-----|-----|-----|-----|-----|----------|----------|
| C1502         | 8               | C         | S          | Adapted    | 2   | 14  | 1   | 249 | 266 | 0.00065  | 0.194246 |
| A2603         | 9               | G         | S          | Adapted    | 2   | 8   | 9   | 208 | 227 | 0.00046  | 0.157065 |
| C1402         | 10              | A         | I          | NonAdapted | 0   | 32  | 8   | 242 | 282 | 0.00048  | 0.174964 |
| A3101         | 15              | D         | A          | Adapted    | 6   | 52  | 6   | 298 | 362 | 0.00021  | 0.105549 |
| B3901         | 15              | A         | A          | NonAdapted | 8   | 15  | 214 | 126 | 363 | 9.03E-05 | 0.062247 |
| B3901         | 23              | A         | A          | NonAdapted | 4   | 17  | 201 | 131 | 353 | 0.00026  | 0.114549 |
| B1301         | 28              | D         | E          | NonAdapted | 0   | 9   | 133 | 237 | 379 | 0.00025  | 0.114117 |
| B5901         | 33              | V         | V          | NonAdapted | 5   | 12  | 163 | 160 | 340 | 0.00026  | 0.114549 |
| C0602         | 39              | R         | R          | NonAdapted | 0   | 12  | 163 | 176 | 351 | 0.00011  | 0.071486 |
| B1511         | 43              | V         | I          | Adapted    | 2   | 11  | 9   | 358 | 380 | 0.00035  | 0.132371 |
| B5502         | 45              | I         | S          | Adapted    | 2   | 14  | 4   | 360 | 380 | 0.00021  | 0.105549 |
| C0803         | 47              | N         | N          | NonAdapted | 9   | 2   | 335 | 11  | 357 | 0.00036  | 0.135227 |
| C0801         | 49              | P         | A          | Adapted    | 3   | 22  | 4   | 192 | 221 | 0.0004   | 0.144775 |
| C0701         | 50              | T         | A          | Adapted    | 4   | 2   | 74  | 291 | 371 | 0.00044  | 0.174964 |
| C1502         | 50              | S         | A          | Adapted    | 2   | 20  | 21  | 328 | 371 | 0.0006   | 0.197341 |
| B4001         | 55              | S         | C          | Adapted    | 4   | 35  | 4   | 315 | 358 | 0.00046  | 0.157065 |
| C0702         | 56              | T         | A          | Adapted    | 4   | 109 | 5   | 262 | 380 | 0.00029  | 0.121041 |
| B4006         | 58              | V         | L          | Adapted    | 5   | 17  | 13  | 247 | 282 | 0.00024  | 0.114549 |
| B1301         | 60              | S         | A          | Adapted    | 2   | 7   | 4   | 344 | 357 | 0.00031  | 0.123216 |
| A1101         | 63              | E         | E          | NonAdapted | 25  | 35  | 172 | 126 | 358 | 0.00027  | 0.114549 |
| B3501         | 63              | E         | E          | NonAdapted | 14  | 30  | 183 | 131 | 358 | 0.00032  | 0.12772  |
| B3501         | 63              | D         | E          | Adapted    | 30  | 14  | 120 | 190 | 354 | 0.00051  | 0.167189 |
| C0102         | 64              | D         | E          | NonAdapted | 0   | 134 | 14  | 232 | 380 | 0.00034  | 0.130147 |
| B6701         | 64              | E         | E          | NonAdapted | 11  | 3   | 312 | 32  | 358 | 0.00052  | 0.167189 |
| B4006         | 65              | E         | E          | NonAdapted | 4   | 26  | 310 | 41  | 381 | 1.78E-19 | 1.47E-15 |
| B4006         | 65              | D         | E          | Adapted    | 20  | 10  | 24  | 327 | 381 | 1.40E-14 | 5.79E-11 |
| C0702         | 71              | R         | R          | NonAdapted | 62  | 53  | 249 | 18  | 382 | 2.18E-18 | 1.35E-14 |
| C0702         | 71              | K         | R          | Adapted    | 44  | 71  | 16  | 251 | 382 | 2.06E-15 | 1.02E-11 |
| B0702         | 71              | T         | R          | Adapted    | 9   | 40  | 5   | 328 | 382 | 4.22E-06 | 0.004909 |
| B5502         | 71              | K         | R          | Adapted    | 6   | 10  | 54  | 312 | 382 | 0.00041  | 0.146607 |
| C0702         | 80              | T         | T          | NonAdapted | 100 | 15  | 262 | 5   | 382 | 2.01E-05 | 0.019203 |
| C0702         | 80              | N         | T          | Adapted    | 9   | 106 | 2   | 265 | 382 | 0.00031  | 0.123216 |
| B3501         | 81              | Y         | Y          | NonAdapted | 13  | 37  | 244 | 88  | 382 | 1.17E-12 | 4.16E-09 |
| B3501         | 81              | F         | Y          | Adapted    | 37  | 13  | 81  | 251 | 382 | 3.77E-12 | 1.17E-08 |
| B3901         | 81              | F         | Y          | Adapted    | 17  | 8   | 101 | 254 | 380 | 9.82E-07 | 0.001807 |
| B3901         | 81              | Y         | Y          | NonAdapted | 6   | 16  | 234 | 97  | 353 | 5.99E-05 | 0.051261 |
| B6701         | 81              | F         | Y          | NonAdapted | 0   | 15  | 118 | 247 | 380 | 0.00038  | 0.142522 |
| C0102         | 82              | K         | K          | NonAdapted | 117 | 11  | 226 | 6   | 360 | 6.77E-05 | 0.054206 |
| B4003         | 82              | Q         | K          | Adapted    | 2   | 2   | 3   | 375 | 382 | 0.00021  | 0.102941 |
| B1501         | 83              | G         | G          | Adapted    | 37  | 6   | 215 | 96  | 354 | 3.26E-05 | 0.029946 |
| B5201         | 83              | A         | G          | NonAdapted | 9   | 68  | 73  | 209 | 359 | 8.88E-05 | 0.066039 |
| A1101         | 83              | A         | G          | NonAdapted | 7   | 53  | 75  | 224 | 359 | 0.00051  | 0.167189 |
| B5101         | 83              | G         | G          | NonAdapted | 29  | 27  | 235 | 91  | 382 | 0.00039  | 0.160428 |
| C1402         | 83              | A         | G          | Adapted    | 19  | 24  | 74  | 265 | 382 | 0.00047  | 0.174964 |
| A0206         | 85              | L         | L          | NonAdapted | 11  | 50  | 146 | 147 | 354 | 6.54E-09 | 1.80E-05 |
| A0206         | 85              | F         | L          | Adapted    | 32  | 29  | 97  | 196 | 354 | 3.46E-06 | 0.004312 |
| C0304         | 85              | V         | L          | NonAdapted | 2   | 78  | 62  | 240 | 382 | 6.64E-06 | 0.007171 |
| A1101         | 85              | V         | L          | NonAdapted | 2   | 61  | 62  | 257 | 382 | 4.56E-05 | 0.040417 |
| C0303         | 85              | F         | L          | Adapted    | 45  | 39  | 94  | 204 | 382 | 9.40E-05 | 0.06247  |
| B0702         | 88              | S         | S          | NonAdapted | 42  | 3   | 299 | 10  | 354 | 0.00059  | 0.179585 |
| A1101         | 92              | K         | K          | NonAdapted | 37  | 23  | 262 | 38  | 360 | 2.11E-07 | 0.000475 |
| A1101         | 92              | R         | K          | Adapted    | 22  | 38  | 38  | 262 | 360 | 1.14E-06 | 0.001886 |
| B4003         | 93              | D         | E          | Adapted    | 4   | 0   | 24  | 332 | 360 | 1.32E-06 | 0.002046 |
| B4003         | 93              | E         | E          | NonAdapted | 0   | 4   | 328 | 28  | 360 | 3.28E-06 | 0.004525 |
| B4403         | 93              | E         | E          | NonAdapted | 23  | 11  | 305 | 21  | 360 | 0.00026  | 0.116349 |
| B4001         | 98              | E         | E          | NonAdapted | 16  | 23  | 239 | 82  | 360 | 4.21E-07 | 0.00087  |
| B4001         | 98              | D         | E          | Adapted    | 22  | 17  | 81  | 240 | 360 | 1.73E-06 | 0.002531 |
| B4002         | 98              | D         | E          | Adapted    | 23  | 30  | 78  | 227 | 358 | 0.00012  | 0.071486 |
| B4002         | 98              | E         | E          | NonAdapted | 30  | 23  | 225 | 80  | 358 | 0.00016  | 0.088169 |
| A0101         | 99              | G         | G          | NonAdapted | 9   | 2   | 347 | 2   | 360 | 0.00058  | 0.178568 |
| A3101         | 101             | T         | I          | Adapted    | 4   | 53  | 1   | 298 | 356 | 0.00017  | 0.089266 |
| C0304         | 101             | I         | I          | Adapted    | 66  | 10  | 201 | 83  | 360 | 0.00013  | 0.077045 |
| C0304         | 101             | V         | I          | NonAdapted | 10  | 66  | 74  | 210 | 360 | 0.00052  | 0.179598 |
| C0102         | 102             | H         | Y          | NonAdapted | 16  | 111 | 35  | 197 | 359 | 0.00012  | 0.071486 |
| B1501         | 105             | Q         | K          | NonAdapted | 0   | 44  | 30  | 285 | 359 | 0.00025  | 0.114549 |
| A0101         | 105             | Q         | K          | Adapted    | 3   | 8   | 27  | 317 | 355 | 0.0005   | 0.167189 |
| B3901         | 114             | I         | V          | Adapted    | 6   | 16  | 35  | 298 | 355 | 0.00027  | 0.114549 |
| B3901         | 114             | V         | V          | NonAdapted | 16  | 6   | 298 | 35  | 355 | 0.00027  | 0.114549 |
| C0401         | 115             | H         | Y          | Adapted    | 3   | 22  | 1   | 333 | 359 | 0.00054  | 0.17251  |
| B5101         | 120             | Y         | Y          | NonAdapted | 13  | 39  | 177 | 130 | 359 | 2.96E-07 | 0.000611 |
| B5101         | 120             | F         | Y          | Adapted    | 35  | 17  | 127 | 180 | 359 | 4.95E-05 | 0.039204 |

|       |     |   |   |            |     |     |     |     |     |          |          |
|-------|-----|---|---|------------|-----|-----|-----|-----|-----|----------|----------|
| C1403 | 120 | F | Y | Adapted    | 22  | 10  | 140 | 187 | 359 | 0.0001   | 0.06247  |
| C1403 | 120 | Y | Y | NonAdapted | 10  | 22  | 180 | 147 | 359 | 0.00014  | 0.080122 |
| B4601 | 120 | Y | Y | NonAdapted | 14  | 23  | 176 | 146 | 359 | 0.00015  | 0.081455 |
| B4601 | 120 | F | Y | Adapted    | 22  | 15  | 140 | 182 | 359 | 0.00024  | 0.114117 |
| C1402 | 125 | Q | Q | NonAdapted | 11  | 28  | 222 | 98  | 359 | 2.21E-08 | 5.48E-05 |
| C1403 | 125 | Q | Q | NonAdapted | 10  | 22  | 218 | 104 | 354 | 1.02E-06 | 0.001807 |
| A3303 | 125 | H | Q | Adapted    | 13  | 24  | 50  | 271 | 358 | 0.00052  | 0.167189 |
| B5101 | 125 | H | Q | Adapted    | 20  | 32  | 43  | 264 | 359 | 0.00013  | 0.077045 |
| C1403 | 125 | H | Q | Adapted    | 13  | 19  | 50  | 277 | 359 | 0.00016  | 0.086431 |
| C1402 | 126 | G | N | Adapted    | 5   | 34  | 0   | 320 | 359 | 1.98E-06 | 0.002735 |
| C1402 | 126 | N | N | NonAdapted | 25  | 14  | 296 | 24  | 359 | 4.35E-06 | 0.004909 |
| B5401 | 126 | N | N | NonAdapted | 40  | 12  | 266 | 25  | 343 | 0.00023  | 0.110152 |
| C1402 | 126 | S | N | Adapted    | 7   | 32  | 9   | 311 | 359 | 0.00057  | 0.178568 |
| B3501 | 133 | I | T | NonAdapted | 3   | 41  | 90  | 224 | 358 | 6.57E-05 | 0.054206 |
| B3501 | 133 | T | T | Adapted    | 34  | 10  | 149 | 165 | 358 | 0.00016  | 0.088014 |
| A2402 | 135 | Y | F | NonAdapted | 21  | 177 | 104 | 56  | 358 | 5.40E-28 | 1.34E-23 |
| A2402 | 135 | F | F | Adapted    | 153 | 45  | 46  | 114 | 358 | 7.26E-20 | 9.01E-16 |
| B3901 | 138 | C | T | Adapted    | 5   | 17  | 24  | 312 | 358 | 0.00048  | 0.174964 |
| A0206 | 152 | D | Q | Adapted    | 3   | 56  | 1   | 283 | 343 | 0.00047  | 0.174964 |
| C0602 | 157 | N | N | Adapted    | 11  | 1   | 234 | 107 | 353 | 0.0002   | 0.103737 |
| C0304 | 159 | E | G | Adapted    | 6   | 68  | 0   | 280 | 354 | 1.35E-05 | 0.013534 |
| B4006 | 161 | D | N | Adapted    | 14  | 14  | 76  | 252 | 356 | 8.06E-05 | 0.057146 |
| C1402 | 162 | T | N | Adapted    | 6   | 33  | 6   | 311 | 356 | 0.0003   | 0.133582 |
| B4006 | 162 | N | N | NonAdapted | 10  | 18  | 223 | 105 | 356 | 0.00039  | 0.160428 |
| C0401 | 163 | R | C | Adapted    | 2   | 23  | 12  | 319 | 356 | 0.00057  | 0.189021 |
| A3303 | 174 | E | D | NonAdapted | 0   | 37  | 61  | 257 | 355 | 9.57E-05 | 0.066039 |
| A3303 | 174 | D | D | Adapted    | 37  | 0   | 257 | 61  | 355 | 9.59E-05 | 0.066039 |
| B4002 | 174 | D | D | Adapted    | 50  | 2   | 243 | 59  | 354 | 0.00012  | 0.071486 |
| B4002 | 174 | E | D | NonAdapted | 2   | 50  | 59  | 243 | 354 | 0.00012  | 0.071486 |
| A0207 | 174 | E | D | Adapted    | 13  | 14  | 48  | 280 | 355 | 0.00052  | 0.179598 |
| A0207 | 174 | D | D | NonAdapted | 14  | 13  | 280 | 48  | 355 | 0.00052  | 0.179598 |
| A0207 | 177 | D | E | Adapted    | 4   | 23  | 1   | 327 | 355 | 9.84E-05 | 0.066039 |
| A0207 | 177 | E | E | NonAdapted | 23  | 4   | 327 | 1   | 355 | 9.84E-05 | 0.066039 |
| A3101 | 188 | R | R | NonAdapted | 22  | 35  | 165 | 132 | 354 | 3.47E-06 | 0.004312 |
| A3101 | 188 | G | R | Adapted    | 4   | 53  | 1   | 296 | 354 | 0.00029  | 0.121041 |
| A3101 | 192 | R | H | NonAdapted | 14  | 33  | 96  | 143 | 286 | 0.00014  | 0.081709 |
| A3101 | 196 | R | R | NonAdapted | 40  | 17  | 273 | 24  | 354 | 1.36E-05 | 0.013534 |
| A0207 | 201 | E | E | NonAdapted | 21  | 6   | 303 | 24  | 354 | 9.68E-05 | 0.066039 |
| C0304 | 201 | D | E | NonAdapted | 0   | 75  | 19  | 260 | 354 | 0.00041  | 0.146607 |
| C0702 | 201 | Q | E | Adapted    | 3   | 101 | 7   | 242 | 353 | 0.00058  | 0.178568 |
| A3101 | 207 | R | * | Adapted    | 4   | 51  | 0   | 276 | 331 | 0.00015  | 0.082355 |

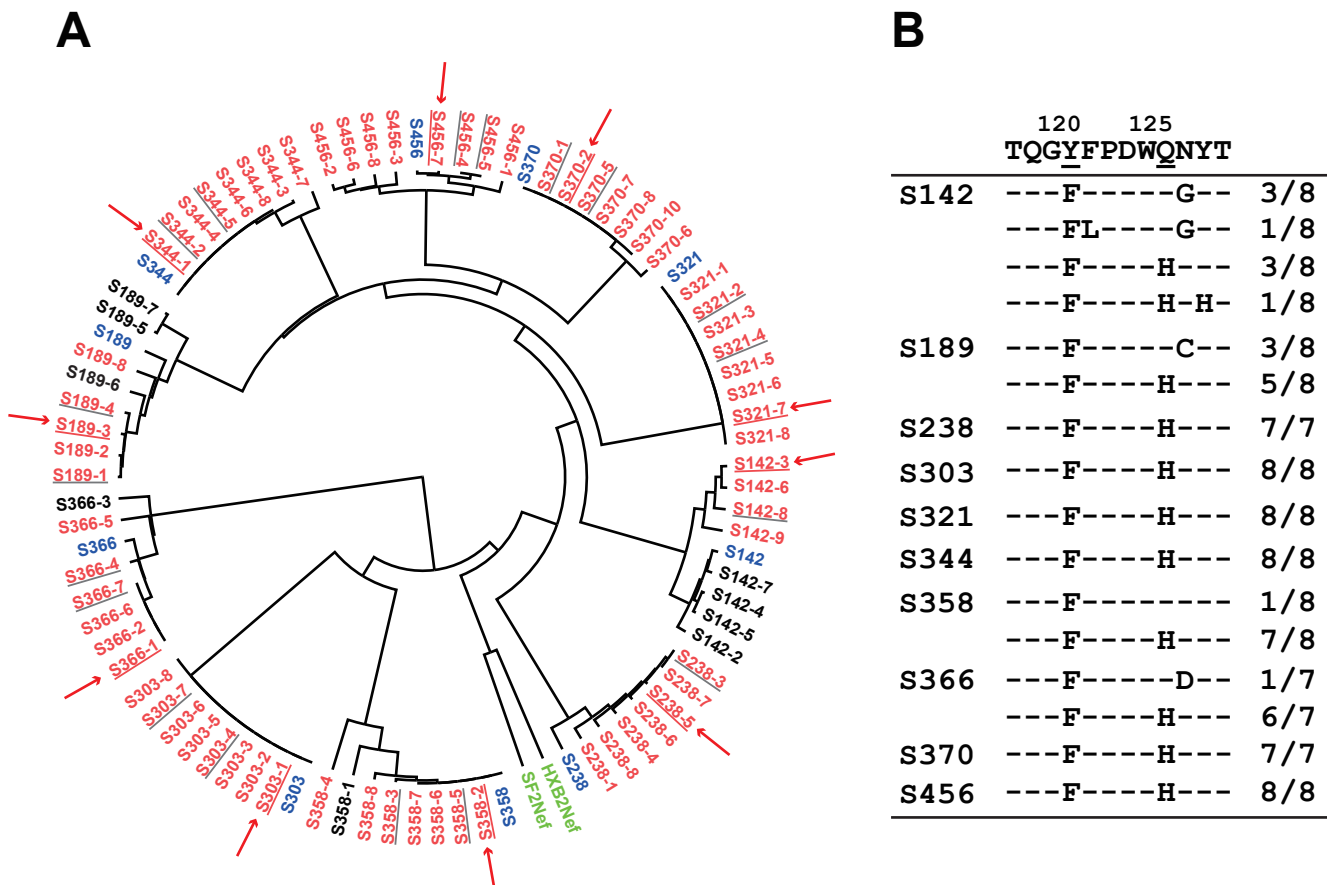

**Fig. S1 Sequence analyses of nef clones isolated from plasma viral RNA of HIV-infected subjects** Maximum-likelihood phylogenetic tree *nef* sequences (panel A) and a part of Nef amino acid sequences of *nef* clones (panel B) isolated from plasma viral RNA of 10 HIV-infected patients (8 clones per patient) are shown. The phylogenetic tree of the *nef* sequences obtained from bulk PCR products and control strains of HXB2 and SF2 are shown in blue and green, respectively. The arrows indicate the Nef clones used for functional analyses (see text).

|             |                                                                    |    |
|-------------|--------------------------------------------------------------------|----|
|             | 1                                                                  | 64 |
| HXB2        | MGGKWSKSSVIGWPTVRERMRRAEPAADRVGAAASRDLEKHGAI TSSNTAATNAACAWLEAQEEE |    |
| S142 clone3 | ..S.....IV..A....K.....EG..V.....N--H.D.V..K....D                  |    |
| S189 clone3 | ..N.....----.....K.....EG..V.....VN--..D.....D.                    |    |
| S238 clone5 | .....C.--..A..K..EQ.....EG.....H--..D.V.....                       |    |
| S303 clone1 | .....R.IV..A....N.T....G..V...AR.....N--..V.....                   |    |
| S321 clone7 | ..S.....IV..A....K.....EG..V.....N--..D.V.....D.                   |    |
| S344 clone1 | .....IV..A....K.....G..V.....TAN--..D.V.....                       |    |
| S358 clone2 | ..S.V.--IV..A....H....VG..V....R.....D.....                        |    |
| S366 clone1 | ..S.....IV..A..K.....EG.....N--..D.V.....                          |    |
| S370 clone2 | .....IV..A....IK.....EG..V.....AN--..D.....                        |    |
| S456 clone7 | .....T.IV..A....Q.....EG..V....R.....IN--..D.V..D...-              |    |

|                                                               |                                                                           |     |
|---------------------------------------------------------------|---------------------------------------------------------------------------|-----|
|                                                               | 65                                                                        | 135 |
|                                                               | EVGFVPVTPQVPLRPMTYKAAVDLSHFLKEKGGLEGLIHSQRRQDILDLDWIYHTQGYFPD-QNYTPGPGVRY |     |
| G.....R.....F.G.F.....R.....D..Y...K.....V.....F...WH.....T.L |                                                                           |     |
| .....R.....F.....Y.K.K.....V.....F...WH.....                  |                                                                           |     |
| .....K.....G.L.....VY..K.K.....V.....F...WH.....T.W           |                                                                           |     |
| .....R.....Y.K.....V.....F...WH.....I..                       |                                                                           |     |
| .....R.....F.G.L.....Y..K.K.....V.....F...WH.....T..          |                                                                           |     |
| .....R.....Y..K.....V.....F...WH.....L                        |                                                                           |     |
| .....R.....W..K..E.....V.....F...WH.....T.F                   |                                                                           |     |
| .....R.....F.G.F.....R.....VY..K.....V.....F...WH.....I..     |                                                                           |     |
| .....R.....G.F.....Y..K.K.....V.....F...WH.....T.F            |                                                                           |     |
| .....R.....F.G.L.....Y..K.K.....V.....F...WH.....I.F          |                                                                           |     |

|                                                                  |                                                                        |     |
|------------------------------------------------------------------|------------------------------------------------------------------------|-----|
|                                                                  | 136                                                                    | 206 |
|                                                                  | PLTFGWCYKLVPEPDKIEEANKGENTSLLHPVSLHGMDPEREVLEWRFD SRLAFHHVARELHPEYFKNC |     |
| .....F.....D..QV.R..E..DN.....M.....E..G..M.K..H..LR.L..K..FYRD. |                                                                        |     |
| .....F.....D..QV.KE.E..N.....M.....K..M.K..L.....I..K..FY.D.     |                                                                        |     |
| .....F.....D..QV.KE.E..N.....M.Q.....K..V.K..K.....M.K.K..FY.D.  |                                                                        |     |
| .....F.....KE.V...E..NC..M.Q.....M.K.....M.K.Q...Y.D.            |                                                                        |     |
| .....F.....QV.A..ER.D.N..M.....K..M.K..H.....M..K..FY.D.         |                                                                        |     |
| .....F.....D..QV.KE.E..N.....M.....E..K..M.K..H..LR.L..K..FY.D.  |                                                                        |     |
| .....F.....E.V...TV..NC..I.Q.....K..M.K.....M..K..FY.D.          |                                                                        |     |
| .....F.....D..QV.KD.E..TNN...I.....V.K..S..L..R..K..FY.D.        |                                                                        |     |
| .....F.....D..QV.KE.E..TNN..M.....M.....M..K..FY.D.              |                                                                        |     |
| .....F.....D..QV.KE.E..N.....M..IE.....M.K.....M..K..FY.D.       |                                                                        |     |

**Fig. S2 Amino acid sequence of the patient-derived Nef clones**

Full-length amino acid sequences of the Nef clones selected for functional analyses (see Figures 4 and 5) are aligned in respect with the HXB2 strain. Dots denote amino acid residues identical to HXB2, and dashes denote the absence of amino acids at those positions.
